# Supplementary material for: Extracellular vesicle transfer of miR-1 to adipose tissue modifies lipolytic pathways following resistance exercise
Source: PubMed Central journal article supplement (PMC11601556; doi:10.1172/jci.insight.182589), 2024-11-08
Supplement: jciinsight-9-182589-s169.pdf [file jciinsight-9-182589-s169.pdf]

|                            | Male        |              | Female      |             | Total       |
|----------------------------|-------------|--------------|-------------|-------------|-------------|
|                            | Low BF%     | High BF%     | Low BF%     | High BF%    |             |
| <i>n</i>                   | 11          | 7            | 7           | 7           | 32          |
| <u>Race (<i>n</i>; %):</u> |             |              |             |             |             |
| White                      | 7; 64%      | 7; 100%      | 6; 86%      | 4; 57%      | 24; 75%     |
| Black                      | 1; 9%       | 0; 0%        | 0; 0%       | 1; 14%      | 2; 6%       |
| Asian                      | 2; 18%      | 0; 0%        | 1; 14%      | 1; 14%      | 4; 13%      |
| Other                      | 1; 9%       | 0; 0%        | 0; 0%       | 1; 14%      | 2; 6%       |
| Age (yr)                   | 29.4 ± 6.9  | 31.3 ± 6.8   | 25.0 ± 3.9  | 31.2 ± 5.1  | 29.2 ± 6.2  |
| Height (cm)                | 178.9 ± 7.9 | 181.2 ± 4.1  | 167.4 ± 1.8 | 162.7 ± 6.5 | 173.3 ± 9.5 |
| Weight (kg)                | 78.6 ± 10.0 | 107.2 ± 16.4 | 73.3 ± 6.7  | 88.0 ± 20.4 | 85.7 ± 18.2 |
| BMI (kg/m <sup>2</sup> )   | 24.6 ± 2.8  | 32.6 ± 4.3   | 24.7 ± 4.1  | 33.1 ± 6.4  | 28.2 ± 5.9  |
| Body Fat (%)               | 21.7 ± 6.3  | 36.8 ± 4.2   | 32.2 ± 4.4  | 44.3 ± 3.2  | 32.2 ± 10.0 |

**Supplemental Table 1:** *Participant characteristics.* BF% = body fat percentage.

| miR-1 Relative Abundance (Fold Change from BL) | Predictors                      | $\beta$ -Coefficient | $p$ -value |
|------------------------------------------------|---------------------------------|----------------------|------------|
| Muscle                                         | Age                             | -0.041               | 0.081      |
| T-0 EV                                         | Body Mass Index                 | 0.118                | 0.079      |
| T-30 EV                                        | Bilateral Thigh Muscle Mass     | 0.000                | 0.540      |
| T-60 EV                                        | Bilateral Thigh Muscle Mass     | 0.000                | 0.262      |
| T-90 EV                                        | Estimated Visceral Adipose Mass | 0.418                | 0.070      |
| Adipose                                        | Sex                             | 0.954                | 0.257      |

**Supplemental Table 2:** *Low sample size precludes significant findings for predictors of changes in muscle, serum EV, and adipose miR-1. EV = extracellular vesicle; T-0 = 0-minute timepoint; T-30 = 30-minute timepoint; T-60 = 60-minute timepoint; T-90 = 90-minute timepoint.*

| Gene     | log(Fold Change) | p-value |
|----------|------------------|---------|
| CAV2     | -0.399           | 0.049   |
| CYB5B    | -0.282           | 0.046   |
| E2F5     | -1.507           | 0.025   |
| FAM169A  | -2.622           | 0.038   |
| GCLC     | -0.420           | 0.023   |
| GLCCI1   | -0.733           | 0.013   |
| KANK4    | -1.279           | 0.049   |
| MAL2     | -0.917           | 0.039   |
| PGD      | -0.432           | 0.039   |
| PPP2R5A  | -0.308           | 0.045   |
| RTN4IP1  | -0.763           | 0.018   |
| TMEM120B | -0.603           | 0.016   |
| TRIM6    | -1.207           | 0.012   |
| ZNF112   | -1.080           | 0.041   |
| ZNF566   | -0.397           | 0.045   |
| ZNF677   | -0.578           | 0.022   |

**Supplemental Table 3:** *Predicted miR-1 targets identified as differentially downregulated*

*through RNA-sequencing analyses. CAV2 = caveolin 2; CYB5B = cytochrome b5 type B; E2F5 = E2F transcription factor 5; FAM169A = family with sequence similarity 169 member A; GCLC = glutamate-cysteine ligase catalytic subunit; GLCCI1 = glucocorticoid induced 1; KANK4 = KN motif and ankyrin repeat domains 4; MAL2 = T cell differentiation protein 2; PGD = phosphogluconate dehydrogenase; PPP2R5A = protein phosphatase 2 regulatory subunit B'alpha; RTN4IP1 = reticulon 4 interacting protein 1; TMEM120B = transmembrane protein 120B; TRIM6 = tripartite motif-containing protein 6; ZNF112 = zinc finger protein 112; ZNF566 = zinc finger protein 566; ZNF677 = zinc finger protein 677.*

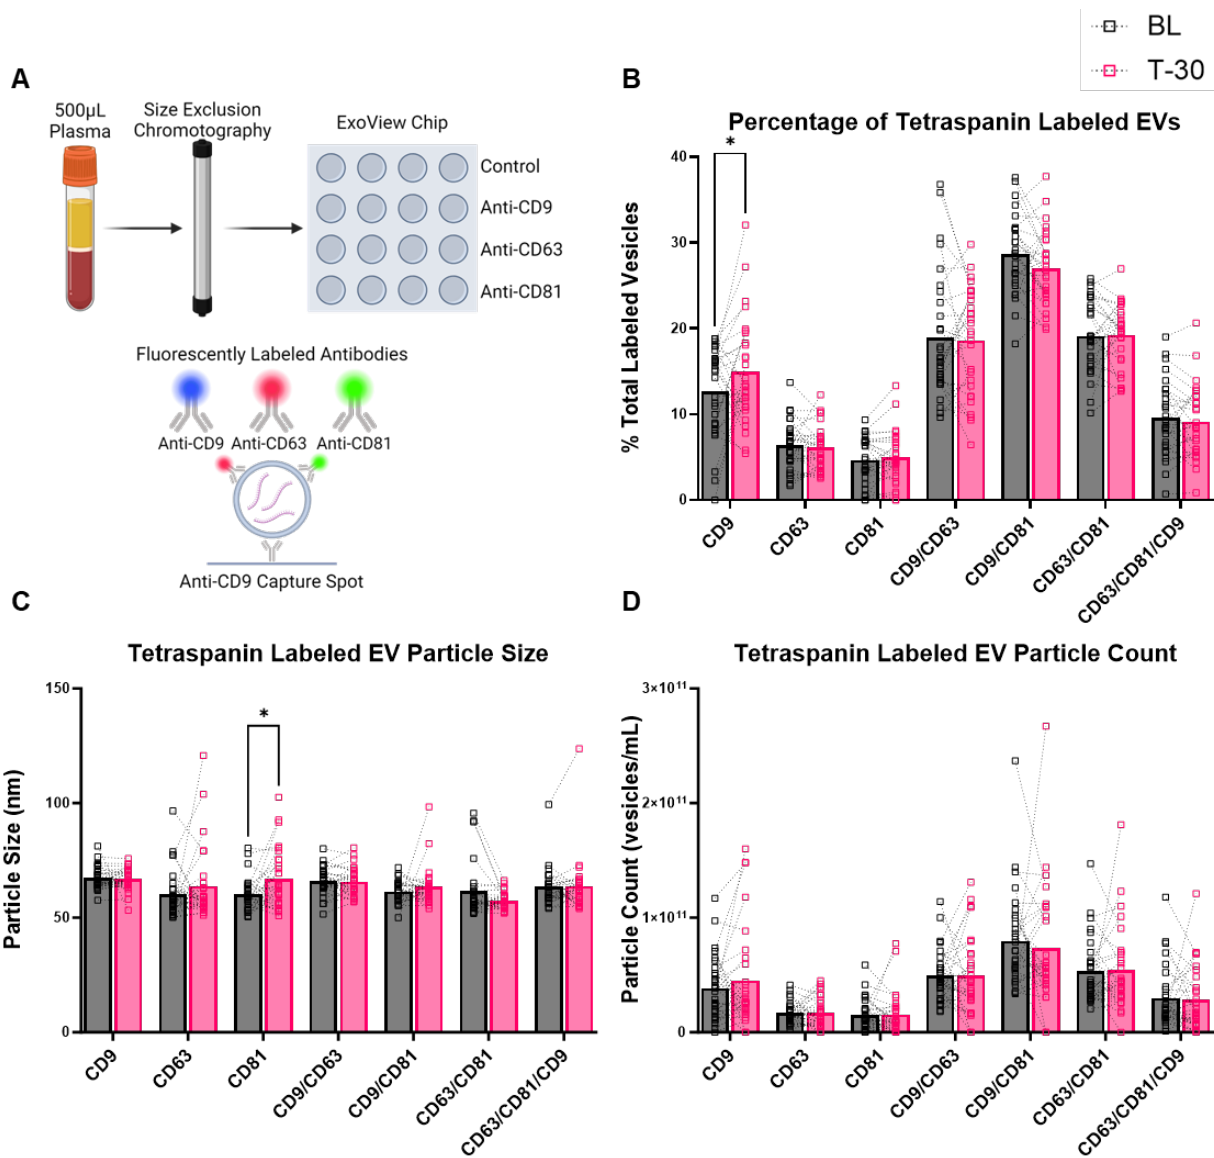

**Supplemental Figure 1: Acute resistance exercise alters extracellular vesicle (EV) size and population composition in humans.** (A) Schematic diagram of the workflow for the protein-capture ExoView platform. Changes in the (B) proportion of labeled EVs, (C) EV particle size, and (D) EV particle count in response to exercise in different populations of tetraspanin-labeled EVs ( $n = 29$ ). Data were analyzed using mixed-effects analyses with Šidák corrections for multiple comparisons. \* =  $p < 0.05$ . BL = baseline; T-30 = 30-minute timepoint.

Low BF% BL     High BF% BL  
 Low BF% T-30     High BF% T-30

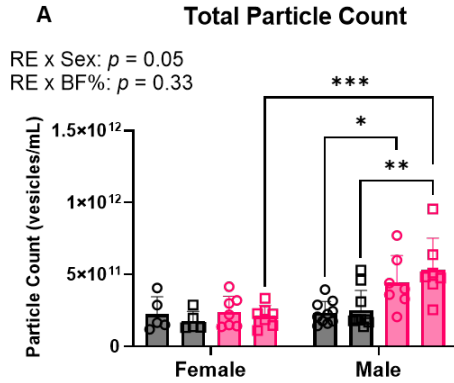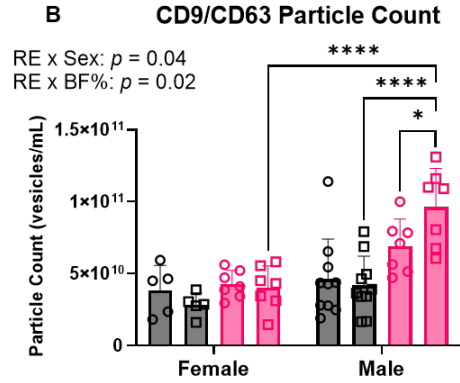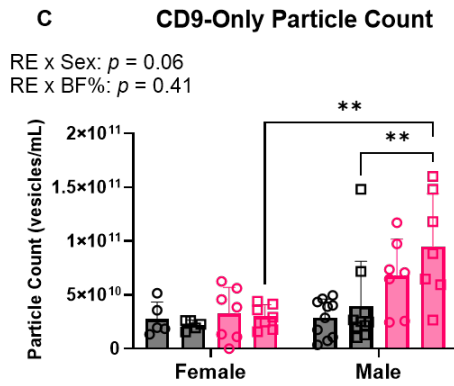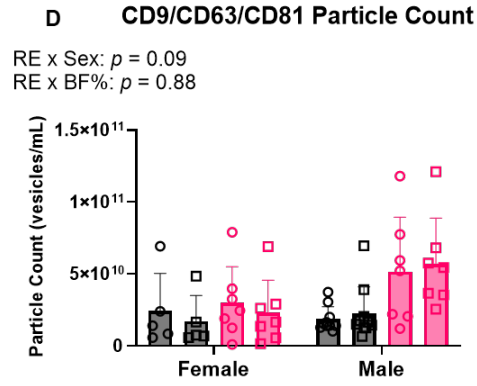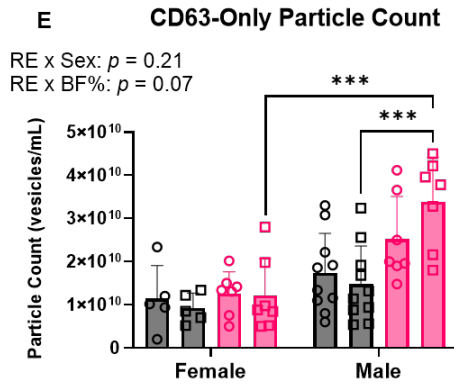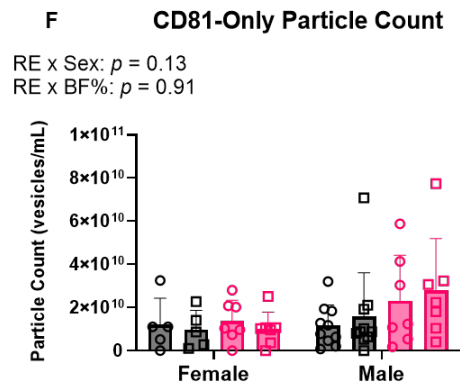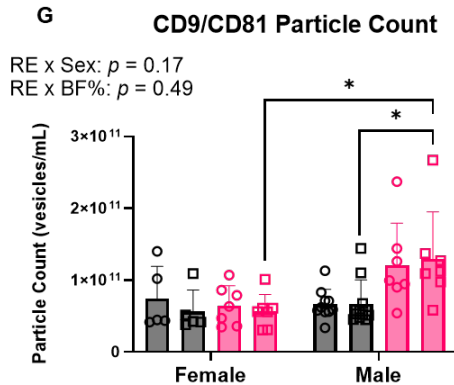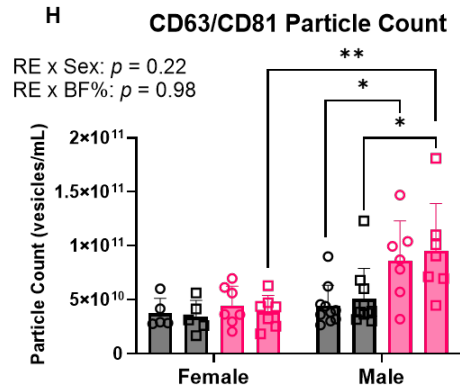

**Supplemental Figure 2: Sex and adiposity alter extracellular vesicle response to acute resistance exercise.** Participants were grouped by sex into high (male  $n = 7$ , female  $n = 7$ ) and low (male  $n = 10$ , female  $n = 5$ ) body fat percentage (BF%) groups. Interactions of sex and BF% with the effects of an acute bout of resistance exercise (RE) on (A) CD63-only, (B) CD9/CD63 double positive, (C) CD9-only, (D) CD9/CD63/CD81 triple positive, (E) total, (F) CD81-only, (G) CD9/CD81 double positive, and (H) CD63/CD81 double positive extracellular vesicles. Data were analyzed using three-way ANOVAs with Šidák corrections for multiple comparisons. \* =  $p < 0.05$ ; \*\* =  $p < 0.01$ ; \*\*\* =  $p < 0.001$ ; \*\*\*\* =  $p < 0.0001$ . BL = baseline; T-30 = 30-minute timepoint.

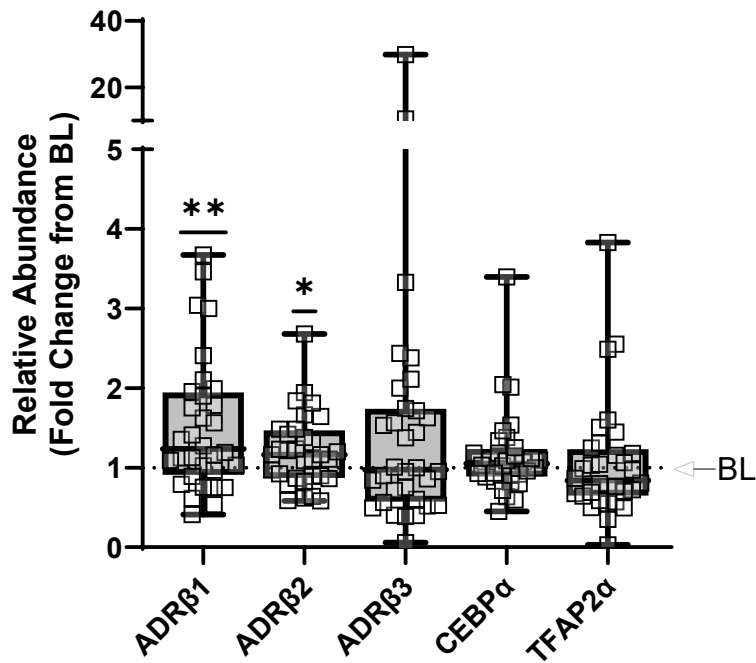

**Supplemental Figure 3:** Resistance exercise increases the expression of ADRβ1 and ADRβ2, but not ADRβ3, CEBPα, or TFAP2α. Transcript abundance of β-adrenergic receptor (*ADRβ*) 1, *ADRβ2*, *ADRβ3*, CCAAT/enhancer-binding protein alpha (*CEBPα*), and transcription factor AP-2 alpha (*TFAP2α*) in adipose tissue relative to baseline (BL; denoted by the dotted line). Data are expressed with min-to-max box plots and were compared using one-sample Wilcoxon t-tests. \* =  $p < 0.05$ ; \*\* =  $p < 0.01$ .
